# Supplementary material for: Comedication and Polypharmacy With ADHD Medications in Adults: A Swedish Nationwide Study
Source: PubMed Central journal article supplement (PMC8369907; doi:10.1177/1087054720923725), 2020-06-01

Table S1. Medications prescribed in Sweden, classified according to the Anatomic Therapeutic Chemical (ATC) Classification System.

| First level of ATC codes                                                       | Second Level of ATC codes                                                                                                                                                                                                                                                       | Example                                                                                                                |
|--------------------------------------------------------------------------------|---------------------------------------------------------------------------------------------------------------------------------------------------------------------------------------------------------------------------------------------------------------------------------|------------------------------------------------------------------------------------------------------------------------|
| A Alimentary tract and metabolism                                              | A01: Stomatological preparations<br>A02: Drugs for acid-related disorders<br>A07: Antidiarrheals, intestinal antiinflammatory/anti-infective agents<br>A10: Drugs used in diabetes<br>A03–A06, A08–A09, A11–A14, A16 <sup>†</sup> ; A15 <sup>‡</sup>                            | Sodium Fluoride<br>Omeprazole<br>Loperamide<br>Metformin                                                               |
| B Blood and bloodforming organs                                                | B01–B03, B05, B06 <sup>†</sup>                                                                                                                                                                                                                                                  | Epinephrine                                                                                                            |
| C Cardiovascular system                                                        | C01: Cardiac therapy<br>C02: Antihypertensives<br>C03: Diuretics<br>C04: Peripheral vasodilators<br>C05: Vasoprotectives<br>C07: $\beta$ -blocking agents<br>C08: Calcium channel blockers<br>C09: Agents acting on the renin-angiotensin system<br>C10: Lipid-modifying agents | Clonidine<br>Furosemide<br>Ergoloid mesylates<br>Prednisolone<br>Propranolol<br>Amlodipine<br>Enalapril<br>Simvastatin |
| D Dermatologicals                                                              | D04: Antipruritics, including antihistamines, anesthetics<br>D05: Antipsoriatics<br>D06: Antibiotics and chemotherapeutics for dermatologic use<br>D07: Corticosteroids, dermatologic preparations<br>D11: Other dermatologic preparations<br>D01–D03, D08–D10 <sup>†</sup>     | Diphenhydramine<br>Acitretin<br>Demeclocycline<br>Hydrocortisone<br>Glycopyrronium                                     |
| G Genitourinary system and reproductive hormones                               | G02: Other gynecological drugs<br>G03: Sex hormones and modulators of the genital system<br>G04: Urological drugs<br>G01 <sup>†</sup>                                                                                                                                           | Methylethergometrine<br>Estradiol<br>Oxybutynin                                                                        |
| H Systemic hormonal preparations, excluding reproductive hormones and insulins | H01: Pituitary and hypothalamic hormones and analogs<br>H02: Corticosteroids for systemic use<br>H03: Thyroid therapy<br>H04: Pancreatic hormones<br>H05: Calcium homeostasis                                                                                                   | Somatropin<br>Hydrocortisone<br>Thiamazole<br>Glucagon<br>Paricalcitol                                                 |
| J Antiinfectives for systemic use                                              | J01: Antibacterials for systemic use<br>J02: Antimycotics for systemic use<br>J04: Antimycobacterials<br>J05: Antivirals for systemic use<br>J06–J07 <sup>†</sup>                                                                                                               | Doxycycline<br>Fluconazole<br>Rifampicin<br>Valaciclovir                                                               |
| L Antineoplastic and immunomodulating agents                                   | L01: Antineoplastic agents<br>L02: Endocrine therapy<br>L03: Immunostimulants<br>L04: Immunosuppressants                                                                                                                                                                        | Bendamustine<br>Triptorelin<br>Filgrastim<br>Mycophenolic acid                                                         |
| M Musculoskeletal system                                                       | M01: Anti-inflammatory and antirheumatic drugs<br>M02–M05, M09 <sup>†</sup>                                                                                                                                                                                                     | Diclofenac                                                                                                             |
| N Nervous system                                                               | N01: Anesthetics<br>N02: Analgesics<br>N03: Antiepileptics<br>N04: Antiparkinson drugs<br>N05: Psycholeptics<br>N06: Psychoanaleptics<br>N07: Other nervous system drugs                                                                                                        | Lidocaine<br>Morphine<br>Carbamazepine<br>Carbidopa levodopa<br>Zopiclone<br>Sertraline<br>Disulfiram                  |
| P Antiparasitic products, insecticides, and repellents                         | P01: Antiprotozoal drugs<br>P02: Anthelmintics<br>P03 <sup>†</sup>                                                                                                                                                                                                              | Metronidazole<br>Mebendazole                                                                                           |
| R Respiratory system                                                           | R01: Nasal preparations<br>R03: Drugs for obstructive airway diseases<br>R05: Cough and cold drugs<br>R06: Antihistamines for systemic use<br>R07: Other respiratory system products<br>R02 <sup>†</sup>                                                                        | Mometasone<br>Terbutaline<br>Acetylcysteine<br>Alimemazine<br>Nitric oxide                                             |
| S Sensory organs                                                               | S01: Ophthalmologicals<br>S02–S03 <sup>†</sup>                                                                                                                                                                                                                                  | Brimonidine                                                                                                            |
| V Various                                                                      | V01, V03, V04, V06–V10 <sup>†</sup> ; V20 <sup>‡</sup>                                                                                                                                                                                                                          |                                                                                                                        |

<sup>†</sup> Codes that were not available in the Prescribed Drug Register.

<sup>‡</sup> Codes for medications not used in Sweden.

Table S2. Patterns of ADHD medication prescriptions among adults in 2013, stratified by age group and sex.

|                                   | Male                                    |                                 |                           | Female                    |                                 |                           |
|-----------------------------------|-----------------------------------------|---------------------------------|---------------------------|---------------------------|---------------------------------|---------------------------|
|                                   | Young adults <sup>†</sup><br>(N=11,220) | Middle-aged adults<br>(N=8,931) | Older adults<br>(N=2,339) | Young adults<br>(N=9,409) | Middle-aged adults<br>(N=7,958) | Older adults<br>(N=1,983) |
| <b>Type (%)</b>                   |                                         |                                 |                           |                           |                                 |                           |
| Methylphenidate                   | 9,951 (88.69%)                          | 7,759 (86.88%)                  | 1,956 (83.63%)            | 8,430 (89.60%)            | 6,913 (86.87%)                  | 1,628 (82.10%)            |
| Dexamfetamine                     | 237 (2.11%)                             | 529 (5.92%)                     | 145 (6.20%)               | 205 (2.18%)               | 416 (5.23%)                     | 109 (5.50%)               |
| Amphetamine                       | 78 (0.70%)                              | 141 (1.58%)                     | 87 (3.72%)                | 63 (0.67%)                | 196 (2.46%)                     | 131 (6.61%)               |
| Atomoxetine                       | 1,768 (15.76%)                          | 1,165 (13.04%)                  | 307 (13.13%)              | 1,468 (15.60%)            | 1,067 (13.41%)                  | 240 (12.10%)              |
| Lisdexamfetamine                  | 92 (0.82%)                              | 104 (1.16%)                     | 19 (0.81%)                | 45 (0.48%)                | 73 (0.92%)                      | 14 (0.71%)                |
| Guanfacine                        | 7 (0.06%)                               | 1 (0.01%)                       | 1 (0.04%)                 | 0 (0%)                    | 0 (0%)                          | 0 (0%)                    |
| <b>Source (%)</b>                 |                                         |                                 |                           |                           |                                 |                           |
| Primary care                      | 180 (1.60%)                             | 96 (1.07%)                      | 42 (1.80%)                | 100 (1.06%)               | 49 (0.62%)                      | 27 (1.36%)                |
| Specialist care <sup>‡</sup>      | 821 (7.32%)                             | 538 (6.02%)                     | 218 (9.32%)               | 572 (6.08%)               | 527 (6.62%)                     | 236 (11.90%)              |
| Psychiatric care                  | 10,219 (91.08%)                         | 8,297 (92.90%)                  | 2,079 (88.88%)            | 8,737 (92.86%)            | 7,382 (92.76%)                  | 1,720 (86.74%)            |
| <b>Duration of medication (%)</b> |                                         |                                 |                           |                           |                                 |                           |
| Single prescription <sup>§</sup>  | 865 (7.71%)                             | 345 (3.86%)                     | 99 (4.23%)                | 573 (6.09%)               | 341 (4.28%)                     | 98 (4.94%)                |
| Short term ( $\leq$ 6m)           | 1,207 (10.76%)                          | 645 (7.22%)                     | 146 (6.24%)               | 982 (10.44%)              | 519 (6.52%)                     | 127 (6.40%)               |
| Medium term (6-12m)               | 1,285 (11.45%)                          | 771 (8.63%)                     | 166 (7.10%)               | 1,149 (12.21%)            | 653 (8.21%)                     | 144 (7.26%)               |
| Long term ( $>$ 12m)              | 7,863 (70.08%)                          | 7,170 (80.28%)                  | 1,928 (82.43%)            | 6,705 (71.26%)            | 6,445 (80.99%)                  | 1,614 (81.39%)            |

<sup>†</sup> Young adults refer to patients aged 18-29 years, middle-aged adults refers to patients aged 30-49 years, and older adults referred to patients aged 50-64 years.

<sup>‡</sup> Specialist care excluding psychiatry.

<sup>§</sup> Single prescription here entail single dispensed prescriptions of any ADHD medication. Switching between different types of ADHD medications is not captured by this number.

Table S3. The ten most commonly dispensed respiratory system medications among individuals receiving ADHD medications by age category.

| Name                               | ATC     | Frequency | Percentage |
|------------------------------------|---------|-----------|------------|
| Young adults (18-29 years)         |         |           |            |
| Alimemazine                        | R06AD01 | 2,424     | 11.75%     |
| Promethazine                       | R06AD02 | 2,078     | 10.07%     |
| Mometasone                         | R01AD09 | 1,628     | 7.89%      |
| Opium derivatives and expectorants | R05FA02 | 1,528     | 7.41%      |
| Terbutaline                        | R03AC03 | 1,450     | 7.03%      |
| Combinations                       | R05CB10 | 1,145     | 5.55%      |
| Desloratadine                      | R06AX27 | 1,112     | 5.39%      |
| Budesonide                         | R03BA02 | 1,000     | 4.85%      |
| Salbutamol                         | R03AC02 | 727       | 3.52%      |
| Loratadine                         | R06AX13 | 616       | 2.99%      |
| Middle-aged adults (30-49 years)   |         |           |            |
| Alimemazine                        | R06AD01 | 2,799     | 16.57%     |
| Opium derivatives and expectorants | R05FA02 | 2,164     | 12.81%     |
| Promethazine                       | R06AD02 | 2,065     | 12.23%     |
| Mometasone                         | R01AD09 | 2,014     | 11.92%     |
| Terbutaline                        | R03AC03 | 1,692     | 10.02%     |
| Budesonide                         | R03BA02 | 1,249     | 7.40%      |
| Combinations                       | R05CB10 | 1,098     | 6.50%      |
| Desloratadine                      | R06AX27 | 1,063     | 6.29%      |
| Salbutamol                         | R03AC02 | 873       | 5.17%      |
| Acetylcysteine                     | R05CB01 | 831       | 4.92%      |
| Older adults (50-64 years)         |         |           |            |
| Alimemazine                        | R06AD01 | 692       | 16.01%     |
| Opium derivatives and expectorants | R05FA02 | 586       | 13.56%     |
| Mometasone                         | R01AD09 | 532       | 12.31%     |
| Acetylcysteine                     | R05CB01 | 461       | 10.67%     |
| Promethazine                       | R06AD02 | 411       | 9.51%      |
| Terbutaline                        | R03AC03 | 403       | 9.32%      |
| Combinations                       | R05CB10 | 319       | 7.38%      |
| Formoterol and budesonide          | R03AK07 | 315       | 7.29%      |
| Budesonide                         | R03BA02 | 305       | 7.06%      |
| Salbutamol                         | R03AC02 | 292       | 6.76%      |

Table S4. The ten most commonly dispensed alimentary tract and metabolic medications among individuals receiving ADHD medications by age category.

| Name                                                           | ATC     | Frequency | Percentage |
|----------------------------------------------------------------|---------|-----------|------------|
| Young adults (18-29 years)                                     |         |           |            |
| Omeprazole                                                     | A02BC01 | 1,951     | 9.46%      |
| Sodium fluoride                                                | A01AA01 | 1,214     | 5.88%      |
| Combinations of sodium fluoride and sodium monofluorophosphate | A01AA30 | 561       | 2.72%      |
| Esomeprazole                                                   | A02BC05 | 225       | 1.09%      |
| Insulin aspart                                                 | A10AB05 | 173       | 0.84%      |
| Loperamide                                                     | A07DA03 | 167       | 0.81%      |
| Insulin glargine                                               | A10AE04 | 136       | 0.66%      |
| Ranitidine                                                     | A02BA02 | 128       | 0.62%      |
| Benzydamine                                                    | A01AD02 | 127       | 0.62%      |
| Nystatin                                                       | A07AA02 | 119       | 0.58%      |
| Middle-aged adults (30-49 years)                               |         |           |            |
| Omeprazole                                                     | A02BC01 | 3,169     | 18.76%     |
| Sodium fluoride                                                | A01AA01 | 1,410     | 8.35%      |
| Combinations of sodium fluoride and sodium monofluorophosphate | A01AA30 | 989       | 5.86%      |
| Esomeprazole                                                   | A02BC05 | 468       | 2.77%      |
| Metformin                                                      | A10BA02 | 328       | 1.94%      |
| Loperamide                                                     | A07DA03 | 310       | 1.84%      |
| Nystatin                                                       | A07AA02 | 224       | 1.33%      |
| Insulin aspart                                                 | A10AB05 | 145       | 0.86%      |
| Ranitidine                                                     | A02BA02 | 142       | 0.84%      |
| Insulin glargine                                               | A10AE04 | 140       | 0.83%      |
| Older adults (50-64 years)                                     |         |           |            |
| Omeprazole                                                     | A02BC01 | 1,238     | 28.64%     |
| Sodium fluoride                                                | A01AA01 | 463       | 10.71%     |
| Combinations of sodium fluoride and sodium monofluorophosphate | A01AA30 | 324       | 7.50%      |
| Metformin                                                      | A10BA02 | 216       | 5.00%      |
| Esomeprazole                                                   | A02BC05 | 191       | 4.42%      |
| Loperamide                                                     | A07DA03 | 148       | 3.42%      |
| Nystatin                                                       | A07AA02 | 120       | 2.78%      |
| Ranitidine                                                     | A02BA02 | 71        | 1.64%      |
| Insulin (human)                                                | A10AC01 | 68        | 1.57%      |
| Insulin aspart                                                 | A10AB05 | 54        | 1.25%      |

Table S5. The ten most commonly dispensed cardiovascular system medications among individuals receiving ADHD medications by age category.

| Name                             | ATC     | Frequency | Percentage |
|----------------------------------|---------|-----------|------------|
| Young adults (18-29 years)       |         |           |            |
| Propranolol                      | C07AA05 | 615       | 2.98%      |
| Epinephrine                      | C01CA24 | 243       | 1.18%      |
| Metoprolol                       | C07AB02 | 241       | 1.17%      |
| Hydrocortisone                   | C05AA01 | 195       | 0.95%      |
| Prednisolone                     | C05AA04 | 178       | 0.86%      |
| Enalapril                        | C09AA02 | 71        | 0.34%      |
| Bisoprolol                       | C07AB07 | 64        | 0.31%      |
| Atenolol                         | C07AB03 | 57        | 0.28%      |
| Furosemide                       | C03CA01 | 55        | 0.27%      |
| Glyceryl trinitrate              | C05AE01 | 36        | 0.17%      |
| Middle-aged adults (30-49 years) |         |           |            |
| Propranolol                      | C07AA05 | 871       | 5.16%      |
| Metoprolol                       | C07AB02 | 710       | 4.20%      |
| Enalapril                        | C09AA02 | 638       | 3.78%      |
| Amlodipine                       | C08CA01 | 417       | 2.47%      |
| Furosemide                       | C03CA01 | 374       | 2.21%      |
| Simvastatin                      | C10AA01 | 359       | 2.13%      |
| Losartan                         | C09CA01 | 284       | 1.68%      |
| Prednisolone                     | C05AA04 | 240       | 1.42%      |
| Hydrocortisone                   | C05AA01 | 214       | 1.27%      |
| Epinephrine                      | C01CA24 | 203       | 1.20%      |
| Older adults (50-64 years)       |         |           |            |
| Enalapril                        | C09AA02 | 484       | 11.20%     |
| Metoprolol                       | C07AB02 | 425       | 9.83%      |
| Simvastatin                      | C10AA01 | 385       | 8.91%      |
| Amlodipine                       | C08CA01 | 329       | 7.61%      |
| Propranolol                      | C07AA05 | 271       | 6.27%      |
| Furosemide                       | C03CA01 | 239       | 5.53%      |
| Losartan                         | C09CA01 | 211       | 4.88%      |
| Atorvastatin                     | C10AA05 | 143       | 3.31%      |
| Felodipine                       | C08CA02 | 135       | 3.12%      |
| Candesartan                      | C09CA06 | 131       | 3.03%      |

Table S6. The prescription of antipsychotics among individuals receiving ADHD medications by age category.

| Name                             | ATC     | Frequency | Percentage |
|----------------------------------|---------|-----------|------------|
| Young adults (18-29 years)       |         |           |            |
| Quetiapine                       | N05AH04 | 1,556     | 7.54%      |
| Olanzapine                       | N05AH03 | 897       | 4.35%      |
| Aripiprazole                     | N05AX12 | 715       | 3.47%      |
| Levomepromazine                  | N05AA02 | 530       | 2.57%      |
| Risperidone                      | N05AX08 | 512       | 2.48%      |
| Lithium                          | N05AN01 | 341       | 1.65%      |
| Chlorprothixene                  | N05AF03 | 145       | 0.70%      |
| Haloperidol                      | N05AD01 | 121       | 0.59%      |
| Flupentixol                      | N05AF01 | 83        | 0.40%      |
| Zuclopenthixol                   | N05AF05 | 79        | 0.38%      |
| Paliperidone                     | N05AX13 | 43        | 0.21%      |
| Ziprasidone                      | N05AE04 | 42        | 0.20%      |
| Clozapine                        | N05AH02 | 33        | 0.16%      |
| Melperone                        | N05AD03 | 32        | 0.16%      |
| Perphenazine                     | N05AB03 | 21        | 0.10%      |
| Pimozide                         | N05AG02 | 5         | 0.02%      |
| Amisulpride                      | N05AL05 | 1         | <0.01%     |
| Middle-aged adults (30-49 years) |         |           |            |
| Quetiapine                       | N05AH04 | 1,873     | 11.09%     |
| Olanzapine                       | N05AH03 | 1,158     | 6.86%      |
| Aripiprazole                     | N05AX12 | 821       | 4.86%      |
| Levomepromazine                  | N05AA02 | 661       | 3.91%      |
| Lithium                          | N05AN01 | 571       | 3.38%      |
| Risperidone                      | N05AX08 | 429       | 2.54%      |
| Haloperidol                      | N05AD01 | 161       | 0.95%      |
| Zuclopenthixol                   | N05AF05 | 141       | 0.83%      |
| Chlorprothixene                  | N05AF03 | 132       | 0.78%      |
| Flupentixol                      | N05AF01 | 117       | 0.69%      |
| Paliperidone                     | N05AX13 | 72        | 0.43%      |
| Clozapine                        | N05AH02 | 57        | 0.34%      |
| Perphenazine                     | N05AB03 | 56        | 0.33%      |
| Ziprasidone                      | N05AE04 | 50        | 0.30%      |
| Melperone                        | N05AD03 | 28        | 0.17%      |
| Pimozide                         | N05AG02 | 2         | 0.01%      |
| Older adults (50-64 years)       |         |           |            |
| Quetiapine                       | N05AH04 | 440       | 10.18%     |
| Olanzapine                       | N05AH03 | 236       | 5.46%      |
| Aripiprazole                     | N05AX12 | 174       | 4.03%      |
| Levomepromazine                  | N05AA02 | 150       | 3.47%      |
| Lithium                          | N05AN01 | 121       | 2.80%      |
| Risperidone                      | N05AX08 | 91        | 2.11%      |
| Flupentixol                      | N05AF01 | 51        | 1.18%      |
| Zuclopenthixol                   | N05AF05 | 47        | 1.09%      |
| Haloperidol                      | N05AD01 | 39        | 0.90%      |
| Chlorprothixene                  | N05AF03 | 25        | 0.58%      |
| Perphenazine                     | N05AB03 | 22        | 0.51%      |
| Paliperidone                     | N05AX13 | 19        | 0.44%      |
| Clozapine                        | N05AH02 | 14        | 0.32%      |
| Ziprasidone                      | N05AE04 | 7         | 0.16%      |
| Melperone                        | N05AD03 | 6         | 0.14%      |
| Pimozide                         | N05AG02 | 2         | 0.05%      |
| Prochlorperazine                 | N05AB04 | 1         | 0.02%      |

|            |         |   |       |
|------------|---------|---|-------|
| Sertindole | N05AE03 | 1 | 0.02% |
|------------|---------|---|-------|

Table S7. The prescription of anxiolytics, hypnotics, and sedative medications among individuals receiving ADHD medications by age category.

| Name                             | ATC     | Frequency | Percentage |
|----------------------------------|---------|-----------|------------|
| Young adults (18-29 years)       |         |           |            |
| Hydroxyzine                      | N05BB01 | 3,333     | 16.16%     |
| Zopiclone                        | N05CF01 | 3,108     | 15.07%     |
| Melatonin                        | N05CH01 | 2,977     | 14.43%     |
| Propiomazine                     | N05CM06 | 2,549     | 12.36%     |
| Zolpidem                         | N05CF02 | 1,905     | 9.23%      |
| Oxazepam                         | N05BA04 | 1,439     | 6.98%      |
| Diazepam                         | N05BA01 | 1,014     | 4.92%      |
| Alprazolam                       | N05BA12 | 504       | 2.44%      |
| Nitrazepam                       | N05CD02 | 234       | 1.13%      |
| Buspirone                        | N05BE01 | 223       | 1.08%      |
| Zaleplon                         | N05CF03 | 99        | 0.48%      |
| Flunitrazepam                    | N05CD03 | 69        | 0.33%      |
| Lorazepam                        | N05BA06 | 45        | 0.22%      |
| Triazolam                        | N05CD05 | 45        | 0.22%      |
| Clomethiazole                    | N05CM02 | 38        | 0.18%      |
| Midazolam                        | N05CD08 | 22        | 0.11%      |
| Clobazam                         | N05BA09 | 6         | 0.03%      |
| Valerianae radix                 | N05CM09 | 2         | 0.01%      |
| Middle-aged adults (30-49 years) |         |           |            |
| Zopiclone                        | N05CF01 | 4,717     | 27.93%     |
| Hydroxyzine                      | N05BB01 | 3,378     | 20.00%     |
| Propiomazine                     | N05CM06 | 3,065     | 18.15%     |
| Zolpidem                         | N05CF02 | 2,799     | 16.57%     |
| Oxazepam                         | N05BA04 | 2,459     | 14.56%     |
| Diazepam                         | N05BA01 | 1,921     | 11.37%     |
| Melatonin                        | N05CH01 | 1,707     | 10.11%     |
| Alprazolam                       | N05BA12 | 1,000     | 5.92%      |
| Nitrazepam                       | N05CD02 | 485       | 2.87%      |
| Buspirone                        | N05BE01 | 316       | 1.87%      |
| Flunitrazepam                    | N05CD03 | 189       | 1.12%      |
| Zaleplon                         | N05CF03 | 186       | 1.10%      |
| Clomethiazole                    | N05CM02 | 64        | 0.38%      |
| Lorazepam                        | N05BA06 | 51        | 0.30%      |
| Triazolam                        | N05CD05 | 47        | 0.28%      |
| Midazolam                        | N05CD08 | 2         | 0.01%      |
| Valerianae radix                 | N05CM09 | 2         | 0.01%      |
| Clobazam                         | N05BA09 | 1         | 0.01%      |
| Older adults (50-64 years)       |         |           |            |
| Zopiclone                        | N05CF01 | 1,319     | 30.52%     |
| Hydroxyzine                      | N05BB01 | 844       | 19.53%     |
| Propiomazine                     | N05CM06 | 784       | 18.14%     |
| Zolpidem                         | N05CF02 | 771       | 17.84%     |
| Oxazepam                         | N05BA04 | 741       | 17.14%     |
| Diazepam                         | N05BA01 | 566       | 13.10%     |
| Melatonin                        | N05CH01 | 351       | 8.12%      |
| Alprazolam                       | N05BA12 | 241       | 5.58%      |
| Nitrazepam                       | N05CD02 | 148       | 3.42%      |
| Flunitrazepam                    | N05CD03 | 86        | 1.99%      |
| Buspirone                        | N05BE01 | 63        | 1.46%      |

|               |         |    |       |
|---------------|---------|----|-------|
| Zaleplon      | N05CF03 | 57 | 1.32% |
| Clomethiazole | N05CM02 | 19 | 0.44% |
| Triazolam     | N05CD05 | 15 | 0.35% |
| Lorazepam     | N05BA06 | 14 | 0.32% |
| Midazolam     | N05CD08 | 2  | 0.05% |

Table S8. The prescription of antiepileptics among individuals receiving ADHD medications by age category.

| Name                             | ATC     | Frequency | Percentage |
|----------------------------------|---------|-----------|------------|
| Young adults (18-29 years)       |         |           |            |
| Lamotrigine                      | N03AX09 | 1,318     | 6.39%      |
| Pregabalin                       | N03AX16 | 927       | 4.49%      |
| Valproic acid                    | N03AG01 | 501       | 2.43%      |
| Gabapentin                       | N03AX12 | 223       | 1.08%      |
| Carbamazepine                    | N03AF01 | 218       | 1.06%      |
| Clonazepam                       | N03AE01 | 170       | 0.82%      |
| Topiramate                       | N03AX11 | 122       | 0.59%      |
| Levetiracetam                    | N03AX14 | 54        | 0.26%      |
| Oxcarbazepine                    | N03AF02 | 18        | 0.09%      |
| Zonisamide                       | N03AX15 | 10        | 0.05%      |
| Lacosamide                       | N03AX18 | 7         | 0.03%      |
| Phenobarbital                    | N03AA02 | 3         | 0.01%      |
| Ethosuximide                     | N03AD01 | 3         | 0.01%      |
| Sultiame                         | N03AX03 | 3         | 0.01%      |
| Phenytoin                        | N03AB02 | 1         | <0.01%     |
| Rufinamide                       | N03AF03 | 1         | <0.01%     |
| Vigabatrin                       | N03AG04 | 1         | <0.01%     |
| Perampanel                       | N03AX22 | 1         | <0.01%     |
| Middle-aged adults (30-49 years) |         |           |            |
| Lamotrigine                      | N03AX09 | 1,596     | 9.45%      |
| Pregabalin                       | N03AX16 | 1,539     | 9.11%      |
| Valproic acid                    | N03AG01 | 645       | 3.82%      |
| Gabapentin                       | N03AX12 | 473       | 2.80%      |
| Clonazepam                       | N03AE01 | 336       | 1.99%      |
| Carbamazepine                    | N03AF01 | 305       | 1.81%      |
| Topiramate                       | N03AX11 | 175       | 1.04%      |
| Levetiracetam                    | N03AX14 | 54        | 0.32%      |
| Oxcarbazepine                    | N03AF02 | 11        | 0.07%      |
| Phenobarbital                    | N03AA02 | 6         | 0.04%      |
| Phenytoin                        | N03AB02 | 6         | 0.04%      |
| Primidone                        | N03AA03 | 2         | 0.01%      |
| Zonisamide                       | N03AX15 | 2         | 0.01%      |
| Rufinamide                       | N03AF03 | 1         | 0.01%      |
| Vigabatrin                       | N03AG04 | 1         | 0.01%      |
| Lacosamide                       | N03AX18 | 1         | 0.01%      |
| Perampanel                       | N03AX22 | 1         | 0.01%      |
| Older adults (50-64 years)       |         |           |            |
| Pregabalin                       | N03AX16 | 396       | 9.16%      |
| Lamotrigine                      | N03AX09 | 362       | 8.38%      |
| Gabapentin                       | N03AX12 | 136       | 3.15%      |
| Valproic acid                    | N03AG01 | 127       | 2.94%      |
| Clonazepam                       | N03AE01 | 94        | 2.17%      |
| Carbamazepine                    | N03AF01 | 92        | 2.13%      |
| Topiramate                       | N03AX11 | 43        | 0.99%      |
| Levetiracetam                    | N03AX14 | 14        | 0.32%      |



|               |         |   |       |
|---------------|---------|---|-------|
| Phenytoin     | N03AB02 | 4 | 0.09% |
| Oxcarbazepine | N03AF02 | 3 | 0.07% |
| Phenobarbital | N03AA02 | 2 | 0.05% |
| Primidone     | N03AA03 | 1 | 0.02% |
| Perampanel    | N03AX22 | 1 | 0.02% |

Table S9. The prescription of antidepressants among individuals receiving ADHD medications by age category.

| Name                             | ATC     | Frequency | Percentage |
|----------------------------------|---------|-----------|------------|
| Young adults (18-29 years)       |         |           |            |
| Sertraline                       | N06AB06 | 2,794     | 13.54%     |
| Mirtazapine                      | N06AX11 | 1,617     | 7.84%      |
| Fluoxetine                       | N06AB03 | 1,457     | 7.06%      |
| Escitalopram                     | N06AB10 | 1,167     | 5.66%      |
| Bupropion                        | N06AX12 | 1,131     | 5.48%      |
| Venlafaxine                      | N06AX16 | 1,111     | 5.39%      |
| Citalopram                       | N06AB04 | 868       | 4.21%      |
| Duloxetine                       | N06AX21 | 572       | 2.77%      |
| Agomelatine                      | N06AX22 | 383       | 1.86%      |
| Amitriptyline                    | N06AA09 | 221       | 1.07%      |
| Paroxetine                       | N06AB05 | 218       | 1.06%      |
| Clomipramine                     | N06AA04 | 148       | 0.72%      |
| Mianserin                        | N06AX03 | 131       | 0.64%      |
| Reboxetine                       | N06AX18 | 76        | 0.37%      |
| Moclobemide                      | N06AG02 | 16        | 0.08%      |
| Nortriptyline                    | N06AA10 | 6         | 0.03%      |
| Fluvoxamine                      | N06AB08 | 3         | 0.01%      |
| Tranlycypromine                  | N06AF04 | 2         | 0.01%      |
| Maprotiline                      | N06AA21 | 1         | <0.01%     |
| Tryptophan                       | N06AX02 | 1         | <0.01%     |
| Middle-aged adults (30-49 years) |         |           |            |
| Sertraline                       | N06AB06 | 2,244     | 13.29%     |
| Mirtazapine                      | N06AX11 | 1,849     | 10.95%     |
| Venlafaxine                      | N06AX16 | 1,668     | 9.88%      |
| Escitalopram                     | N06AB10 | 1,602     | 9.49%      |
| Bupropion                        | N06AX12 | 1,599     | 9.47%      |
| Citalopram                       | N06AB04 | 1,231     | 7.29%      |
| Fluoxetine                       | N06AB03 | 1,198     | 7.09%      |
| Duloxetine                       | N06AX21 | 1,077     | 6.38%      |
| Agomelatine                      | N06AX22 | 507       | 3.00%      |
| Amitriptyline                    | N06AA09 | 478       | 2.83%      |
| Paroxetine                       | N06AB05 | 350       | 2.07%      |
| Clomipramine                     | N06AA04 | 272       | 1.61%      |
| Mianserin                        | N06AX03 | 201       | 1.19%      |
| Reboxetine                       | N06AX18 | 169       | 1.00%      |
| Moclobemide                      | N06AG02 | 32        | 0.19%      |
| Nortriptyline                    | N06AA10 | 19        | 0.11%      |
| Fluvoxamine                      | N06AB08 | 6         | 0.04%      |
| Tranlycypromine                  | N06AF04 | 4         | 0.02%      |
| Tryptophan                       | N06AX02 | 4         | 0.02%      |
| Trimipramine                     | N06AA06 | 2         | 0.01%      |
| Desvenlafaxine                   | N06AX23 | 2         | 0.01%      |
| Lofepamine                       | N06AA07 | 1         | 0.01%      |
| Maprotiline                      | N06AA21 | 1         | 0.01%      |

|                            |         |     |        |
|----------------------------|---------|-----|--------|
| Phenelzine                 | N06AF03 | 1   | 0.01%  |
| Older adults (50-64 years) |         |     |        |
| Mirtazapine                | N06AX11 | 507 | 11.73% |
| Sertraline                 | N06AB06 | 464 | 10.74% |
| Bupropion                  | N06AX12 | 453 | 10.48% |
| Venlafaxine                | N06AX16 | 407 | 9.42%  |
| Escitalopram               | N06AB10 | 371 | 8.58%  |
| Citalopram                 | N06AB04 | 363 | 8.40%  |
| Duloxetine                 | N06AX21 | 330 | 7.64%  |
| Fluoxetine                 | N06AB03 | 258 | 5.97%  |
| Amitriptyline              | N06AA09 | 190 | 4.40%  |
| Agomelatine                | N06AX22 | 125 | 2.89%  |
| Paroxetine                 | N06AB05 | 103 | 2.38%  |
| Clomipramine               | N06AA04 | 96  | 2.22%  |
| Mianserin                  | N06AX03 | 72  | 1.67%  |
| Reboxetine                 | N06AX18 | 51  | 1.18%  |
| Moclobemide                | N06AG02 | 11  | 0.25%  |
| Nortriptyline              | N06AA10 | 9   | 0.21%  |
| Tryptophan                 | N06AX02 | 2   | 0.05%  |
| Trimipramine               | N06AA06 | 1   | 0.02%  |
| Fluvoxamine                | N06AB08 | 1   | 0.02%  |
| Trazodone                  | N06AX05 | 1   | 0.02%  |

Table S10. The prescription of drugs used in addictive disorders among individuals receiving ADHD medications by age category.

| Name                             | ATC     | Frequency | Percentage |
|----------------------------------|---------|-----------|------------|
| Young adults (18-29 years)       |         |           |            |
| Disulfiram                       | N07BB01 | 307       | 1.49%      |
| Naltrexone                       | N07BB04 | 162       | 0.79%      |
| Varenicline                      | N07BA03 | 137       | 0.66%      |
| Acamprosate                      | N07BB03 | 116       | 0.56%      |
| Buprenorphine. combinations      | N07BC51 | 37        | 0.18%      |
| Buprenorphine                    | N07BC01 | 36        | 0.17%      |
| Nicotine                         | N07BA01 | 32        | 0.16%      |
| Methadone                        | N07BC02 | 30        | 0.15%      |
| Nalmefene                        | N07BB05 | 3         | 0.01%      |
| Drugs used in opioid dependence  | N07BC   | 1         | <0.01%     |
| Middle-aged adults (30-49 years) |         |           |            |
| Disulfiram                       | N07BB01 | 568       | 3.36%      |
| Varenicline                      | N07BA03 | 366       | 2.17%      |
| Naltrexone                       | N07BB04 | 316       | 1.87%      |
| Acamprosate                      | N07BB03 | 265       | 1.57%      |
| Methadone                        | N07BC02 | 165       | 0.98%      |
| Buprenorphine                    | N07BC01 | 130       | 0.77%      |
| Buprenorphine. combinations      | N07BC51 | 100       | 0.59%      |
| Nicotine                         | N07BA01 | 71        | 0.42%      |
| Nalmefene                        | N07BB05 | 5         | 0.03%      |
| Drugs used in opioid dependence  | N07BC   | 1         | 0.01%      |
| Older adults (50-64 years)       |         |           |            |
| Disulfiram                       | N07BB01 | 149       | 3.45%      |
| Varenicline                      | N07BA03 | 114       | 2.64%      |
| Naltrexone                       | N07BB04 | 113       | 2.61%      |
| Acamprosate                      | N07BB03 | 73        | 1.69%      |
| Methadone                        | N07BC02 | 46        | 1.06%      |
| Nicotine                         | N07BA01 | 39        | 0.90%      |
| Buprenorphine                    | N07BC01 | 32        | 0.74%      |
| Buprenorphine. combinations      | N07BC51 | 14        | 0.32%      |
| Nalmefene                        | N07BB05 | 2         | 0.05%      |

Table S11. The prescription of opioids among individuals receiving ADHD medications by age category.

| Name                                      | ATC     | Frequency | Percentage |
|-------------------------------------------|---------|-----------|------------|
| Young adults (18-29 years)                |         |           |            |
| Codeine. combinations excl. psycholeptics | N02AA59 | 1,821     | 8.83%      |
| Tramadol                                  | N02AX02 | 927       | 4.49%      |
| Oxycodone                                 | N02AA05 | 539       | 2.61%      |
| Morphine                                  | N02AA01 | 139       | 0.67%      |
| Morphine and antispasmodics               | N02AG01 | 129       | 0.63%      |
| Buprenorphine                             | N02AE01 | 74        | 0.36%      |
| Ketobemidone                              | N02AB01 | 40        | 0.19%      |
| Oxycodone and naloxone                    | N02AA55 | 25        | 0.12%      |
| Fentanyl                                  | N02AB03 | 13        | 0.06%      |
| Tapentadol                                | N02AX06 | 11        | 0.05%      |
| Ketobemidone and antispasmodics           | N02AG02 | 5         | 0.02%      |
| Middle-aged adults (30-49 years)          |         |           |            |
| Codeine. combinations excl. psycholeptics | N02AA59 | 2,904     | 17.19%     |
| Tramadol                                  | N02AX02 | 1,978     | 11.71%     |
| Oxycodone                                 | N02AA05 | 949       | 5.62%      |
| Morphine                                  | N02AA01 | 337       | 2.00%      |
| Buprenorphine                             | N02AE01 | 221       | 1.31%      |
| Morphine and antispasmodics               | N02AG01 | 181       | 1.07%      |
| Ketobemidone                              | N02AB01 | 116       | 0.69%      |
| Oxycodone and naloxone                    | N02AA55 | 64        | 0.38%      |
| Fentanyl                                  | N02AB03 | 47        | 0.28%      |
| Tapentadol                                | N02AX06 | 41        | 0.24%      |
| Ketobemidone and antispasmodics           | N02AG02 | 14        | 0.08%      |
| Hydromorphone                             | N02AA03 | 2         | 0.01%      |
| Pethidine                                 | N02AB02 | 1         | 0.01%      |
| Older adults (50-64 years)                |         |           |            |
| Codeine. combinations excl. psycholeptics | N02AA59 | 832       | 19.25%     |
| Tramadol                                  | N02AX02 | 611       | 14.14%     |
| Oxycodone                                 | N02AA05 | 291       | 6.73%      |
| Morphine                                  | N02AA01 | 132       | 3.05%      |
| Buprenorphine                             | N02AE01 | 95        | 2.20%      |
| Morphine and antispasmodics               | N02AG01 | 45        | 1.04%      |
| Ketobemidone                              | N02AB01 | 44        | 1.02%      |
| Oxycodone and naloxone                    | N02AA55 | 42        | 0.97%      |
| Fentanyl                                  | N02AB03 | 26        | 0.60%      |
| Tapentadol                                | N02AX06 | 10        | 0.23%      |
| Ketobemidone and antispasmodics           | N02AG02 | 7         | 0.16%      |
| Hydromorphone                             | N02AA03 | 1         | 0.02%      |
| Dextropropoxyphene                        | N02AC04 | 1         | 0.02%      |
| Pentazocine                               | N02AD01 | 1         | 0.02%      |

Figure S1. Dispensation of somatic medications (according to ATC classes) among individuals diagnosed with ADHD and dispensed with ADHD medications, by age group.

| Co-medication                                                | ADHD drug users<br>(N = 35,443) | Control group<br>(N = 35,443) | Odds ratio<br>(95% CI) |  |
|--------------------------------------------------------------|---------------------------------|-------------------------------|------------------------|--|
| <b>A Alimentary tract and metabolism</b>                     |                                 |                               |                        |  |
| Young adults (18-29 years)                                   | 3,595 (19.9%)                   | 954 (5.3%)                    | 4.6 (4.2, 4.9)         |  |
| Middle-aged adults (30-49 years)                             | 4,775 (34.0%)                   | 1,386 (9.9%)                  | 4.8 (4.5, 5.1)         |  |
| Older adults (50-64 years)                                   | 1,578 (47.8%)                   | 609 (18.5%)                   | 4.1 (3.7, 4.6)         |  |
| <b>C Cardiovascular System</b>                               |                                 |                               |                        |  |
| Young adults (18-29 years)                                   | 1,576 (8.7%)                    | 382 (2.1%)                    | 4.5 (4.0, 5.0)         |  |
| Middle-aged adults (30-49 years)                             | 3,320 (23.6%)                   | 1,058 (7.5%)                  | 3.9 (3.6, 4.2)         |  |
| Older adults (50-64 years)                                   | 1,494 (45.3%)                   | 899 (27.3%)                   | 2.2 (2.0, 2.5)         |  |
| <b>D Dermatologicals</b>                                     |                                 |                               |                        |  |
| Young adults (18-29 years)                                   | 2,263 (12.5%)                   | 933 (5.2%)                    | 2.6 (2.4, 2.9)         |  |
| Middle-aged adults (30-49 years)                             | 2,272 (16.2%)                   | 836 (5.9%)                    | 3.1 (2.8, 3.3)         |  |
| Older adults (50-64 years)                                   | 717 (21.7%)                     | 298 (9.0%)                    | 2.8 (2.4, 3.3)         |  |
| <b>G Genitourinary system and reproductive hormones</b>      |                                 |                               |                        |  |
| Young adults (18-29 years)                                   | 5,239 (29.0%)                   | 4,120 (22.8%)                 | 1.7 (1.6, 1.8)         |  |
| Middle-aged adults (30-49 years)                             | 3,134 (22.3%)                   | 1,908 (13.6%)                 | 2.0 (1.8, 2.1)         |  |
| Older adults (50-64 years)                                   | 921 (27.9%)                     | 413 (12.5%)                   | 2.8 (2.4, 3.2)         |  |
| <b>H Systemic hormonal preparations</b>                      |                                 |                               |                        |  |
| Young adults (18-29 years)                                   | 1,477 (8.2%)                    | 609 (3.4%)                    | 2.6 (2.3, 2.8)         |  |
| Middle-aged adults (30-49 years)                             | 2,097 (14.9%)                   | 982 (7.0%)                    | 2.4 (2.2, 2.6)         |  |
| Older adults (50-64 years)                                   | 640 (19.4%)                     | 293 (8.9%)                    | 2.5 (2.2, 3.0)         |  |
| <b>J Antiinfectives for systemic use</b>                     |                                 |                               |                        |  |
| Young adults (18-29 years)                                   | 7,268 (40.2%)                   | 3,442 (19.0%)                 | 3.0 (2.9, 3.2)         |  |
| Middle-aged adults (30-49 years)                             | 6,569 (46.7%)                   | 2,753 (19.6%)                 | 3.7 (3.5, 4.0)         |  |
| Older adults (50-64 years)                                   | 1,600 (48.5%)                   | 658 (19.9%)                   | 3.9 (3.5, 4.3)         |  |
| <b>L Antineoplastic and immunomodulating agents</b>          |                                 |                               |                        |  |
| Young adults (18-29 years)                                   | 155 (0.9%)                      | 106 (0.6%)                    | 1.5 (1.1, 1.9)         |  |
| Middle-aged adults (30-49 years)                             | 246 (1.8%)                      | 196 (1.4%)                    | 1.3 (1.0, 1.5)         |  |
| Older adults (50-64 years)                                   | 98 (3.0%)                       | 64 (1.9%)                     | 1.5 (1.1, 2.1)         |  |
| <b>M Musculoskeletal system</b>                              |                                 |                               |                        |  |
| Young adults (18-29 years)                                   | 3,479 (19.2%)                   | 1,218 (6.7%)                  | 3.4 (3.1, 3.6)         |  |
| Middle-aged adults (30-49 years)                             | 4,860 (34.6%)                   | 1,737 (12.4%)                 | 3.8 (3.6, 4.0)         |  |
| Older adults (50-64 years)                                   | 1,345 (40.8%)                   | 601 (18.2%)                   | 3.1 (2.8, 3.5)         |  |
| <b>P Antiparasitic products, insecticides and repellents</b> |                                 |                               |                        |  |
| Young adults (18-29 years)                                   | 735 (4.1%)                      | 338 (1.9%)                    | 2.3 (2.0, 2.6)         |  |
| Middle-aged adults (30-49 years)                             | 639 (4.5%)                      | 249 (1.8%)                    | 2.7 (2.3, 3.1)         |  |
| Older adults (50-64 years)                                   | 149 (4.5%)                      | 66 (2.0%)                     | 2.3 (1.7, 3.1)         |  |
| <b>R Respiratory system</b>                                  |                                 |                               |                        |  |
| Young adults (18-29 years)                                   | 7,766 (42.9%)                   | 2,474 (13.7%)                 | 4.9 (4.7, 5.2)         |  |
| Middle-aged adults (30-49 years)                             | 7,931 (56.4%)                   | 2,601 (18.5%)                 | 5.9 (5.6, 6.3)         |  |
| Older adults (50-64 years)                                   | 1,994 (60.4%)                   | 729 (22.1%)                   | 5.5 (4.9, 6.1)         |  |
| <b>S Sensory organs</b>                                      |                                 |                               |                        |  |
| Young adults (18-29 years)                                   | 1,300 (7.2%)                    | 570 (3.2%)                    | 2.4 (2.2, 2.6)         |  |
| Middle-aged adults (30-49 years)                             | 1,422 (10.1%)                   | 586 (4.2%)                    | 2.6 (2.4, 2.9)         |  |
| Older adults (50-64 years)                                   | 446 (13.5%)                     | 197 (6.0%)                    | 2.5 (2.1, 3.0)         |  |

Figure S2. Dispensation of additional classes of medications (according to ATC codes) among individuals using ADHD medications, stratified by sex.

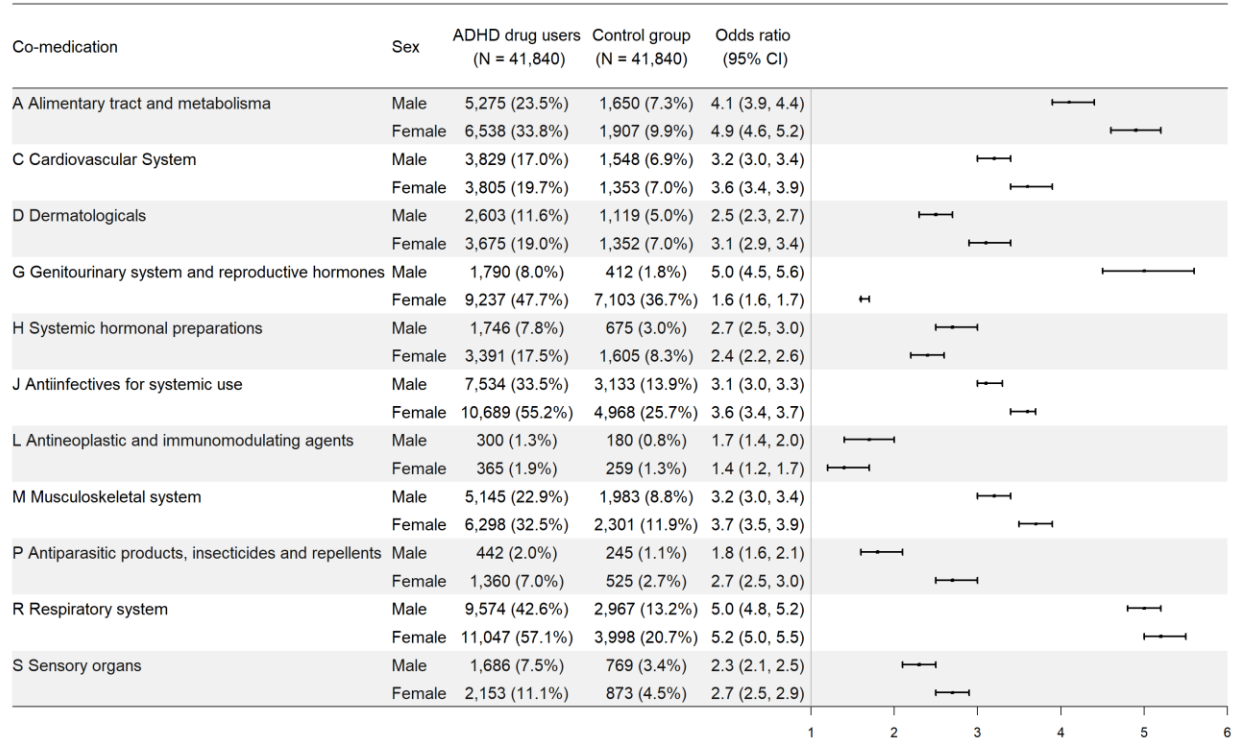

Figure S3. Dispensation of common psychotropic medications among individuals diagnosed with ADHD and dispensed with ADHD medications, by age group.

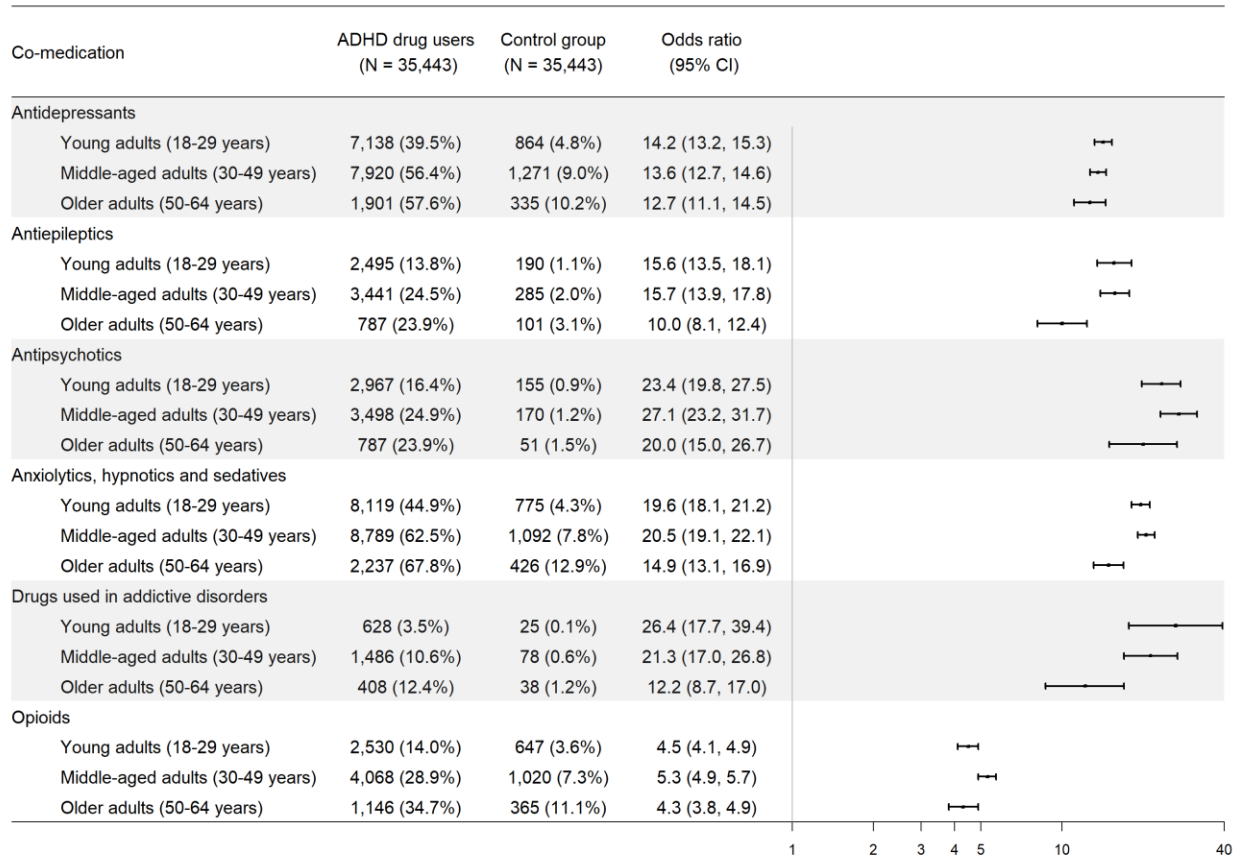

Supplement: Supplementary_material.pdf [file Supplementary_material.pdf]
